# Supplementary material for: Prognostic Prediction Based on Dynamic Contrast-Enhanced MRI and Dynamic Susceptibility Contrast-Enhanced MRI Parameters from Non-Enhancing, T2-High-Signal-Intensity Lesions in Patients with Glioblastoma
Source: PubMed Central journal article supplement — Korean J Radiol. 2021 May 4;22(8):1369–78. doi: 10.3348/kjr.2020.1272 (PMC8316772; doi:10.3348/kjr.2020.1272), 2021-05-04
Supplement: kjr-22-1369-s004.pdf [file kjr-22-1369-s004.pdf]

## Supplementary Results

Spearman's rank correlation analysis revealed no significant correlations between the nCBV from DSC MRI and permeability parameters from DCE MRI (e.g.,  $K_{trans}$ ,  $V_e$ , and  $V_p$ ). The Spearman's rank correlation coefficient  $\rho$  (rho) and the  $p$  value of each pair are illustrated in Supplementary Figure 2.

For the intraclass correlation coefficients (ICCs), there was no significant agreement between the nCBV of DSC MRI and each permeability parameter of DCE MRI. The ICC values and 95% confidence intervals are shown in Supplementary Table 3.
