# Supplementary material for: Prognostic Prediction Based on Dynamic Contrast-Enhanced MRI and Dynamic Susceptibility Contrast-Enhanced MRI Parameters from Non-Enhancing, T2-High-Signal-Intensity Lesions in Patients with Glioblastoma
Source: PubMed Central journal article supplement — Korean J Radiol. 2021 May 4;22(8):1369–78. doi: 10.3348/kjr.2020.1272 (PMC8316772; doi:10.3348/kjr.2020.1272), 2021-05-04
Supplement: kjr-22-1369-s005.pdf [file kjr-22-1369-s005.pdf]

**Supplementary Table 1. MR Imaging Parameters for All Sequences**

| Parameter                      | T1 Transverse | T1 3D MPAGE | T2 Transverse | T2 FLAIR      | DSC       | DCE       |
|--------------------------------|---------------|-------------|---------------|---------------|-----------|-----------|
| Repetition time, ms            | 558           | 1370–1600   | 5100          | 8000–9000     | 1600      | 2.8       |
| Echo time, ms                  | 9.8           | 1.9–2.8     | 89            | 90–97         | 30        | 1         |
| NEX                            | 1             | 1           | 3             | 1–2           | 1         | 1         |
| Flip angle, degree             | 70            | 9           | 150           | 130–150       | 90        | 10        |
| Section thickness, mm          | 5             | 1           | 5             | 5             | 6         | 3         |
| Intersection gap, mm           | 1             | 0           | 1             | 1             | 0.9       | 0         |
| Field of view, mm <sup>2</sup> | 175 x 220     | 250 x 250   | 199 x 220     | 199 x 220     | 240 x 240 | 240 x 240 |
| Matrix                         | 384 x 187     | 256 x 232   | 640 x 348     | 384 x 209–278 | 128 x 128 | 192 x 192 |
| No. of sections                | 48–72         | 162–169     | 48–72         | 48–72         | 48–72     | 40        |

DCE = dynamic contrast-enhanced, DSC = dynamic susceptibility contrast, FLAIR = fluid-attenuated inverse recovery, MPAGE = magnetization-prepared rapid gradient echo, NEX = number of excitations, 3D = three dimensional
