# Supplementary material for: Prognostic Prediction Based on Dynamic Contrast-Enhanced MRI and Dynamic Susceptibility Contrast-Enhanced MRI Parameters from Non-Enhancing, T2-High-Signal-Intensity Lesions in Patients with Glioblastoma
Source: PubMed Central journal article supplement — Korean J Radiol. 2021 May 4;22(8):1369–78. doi: 10.3348/kjr.2020.1272 (PMC8316772; doi:10.3348/kjr.2020.1272), 2021-05-04
Supplement: kjr-22-1369-s006.pdf [file kjr-22-1369-s006.pdf]

**Supplementary Table 2. Permeability and Perfusion Parameters between the EP and NEP Groups**

| Permeability and Perfusion Parameters | NEP Group (n = 61) |               | EP Group (n = 15) |               | P*    |
|---------------------------------------|--------------------|---------------|-------------------|---------------|-------|
|                                       | Mean (SD)          | Median (IQR)  | Mean (SD)         | Median (IQR)  |       |
| Ktrans 95th PV                        | 0.035 (0.029)      | 0.026 (0.031) | 0.079 (0.111)     | 0.048 (0.041) | 0.015 |
| Mean Ktrans                           | 0.011 (0.009)      | 0.009 (0.009) | 0.024 (0.026)     | 0.013 (0.030) | 0.027 |
| Median Ktrans                         | 0.008 (0.006)      | 0.006 (0.007) | 0.015 (0.015)     | 0.008 (0.013) | 0.058 |
| Ve 95th PV                            | 10.23 (9.42)       | 7.64 (9.66)   | 14.96 (11.10)     | 12.50 (19.77) | 0.075 |
| Mean Ve                               | 3.16 (2.93)        | 2.36 (2.52)   | 4.66 (3.54)       | 3.39 (4.33)   | 0.064 |
| Median Ve                             | 1.81(1.74)         | 1.30 (1.40)   | 2.97 (2.63)       | 2.00 (2.50)   | 0.042 |
| Vp 95th PV                            | 3.03 (3.26)        | 2.14 (3.35)   | 4.88 (5.02)       | 2.93 (3.61)   | 0.147 |
| Mean Vp                               | 0.80 (0.83)        | 0.51 (0.86)   | 1.34 (1.45)       | 0.76 (1.15)   | 0.183 |
| Median Vp                             | 0.62 (0.61)        | 0.40 (0.58)   | 1.07 (1.30)       | 0.48 (1.13)   | 0.309 |
| nCBV 95th PV                          | 7.46 (3.04)        | 7.03 (4.75)   | 8.93 (3.10)       | 9.54 (6.34)   | 0.101 |
| Mean nCBV                             | 2.85 (1.28)        | 2.73 (1.41)   | 3.40 (1.27)       | 3.64 (2.26)   | 0.146 |
| Median nCBV                           | 2.64 (1.28)        | 2.57 (1.55)   | 3.06 (1.22)       | 3.28 (1.72)   | 0.250 |

\*Calculated with the Mann-Whitney U test for permeability parameters of dynamic contrast-enhanced MRI (e.g., Ktrans, Ve and Vp) and with an unpaired Student's *t* test for perfusion parameters of dynamic susceptibility contrast MRI (nCBV). EP = early progression, IQR = interquartile ranges, nCBV = normalized relative cerebral blood volume, NEP = nonearly progression, PV = percentile value, SD = standard deviation
