# Supplementary material for: Prognostic Prediction Based on Dynamic Contrast-Enhanced MRI and Dynamic Susceptibility Contrast-Enhanced MRI Parameters from Non-Enhancing, T2-High-Signal-Intensity Lesions in Patients with Glioblastoma
Source: PubMed Central journal article supplement — Korean J Radiol. 2021 May 4;22(8):1369–78. doi: 10.3348/kjr.2020.1272 (PMC8316772; doi:10.3348/kjr.2020.1272), 2021-05-04
Supplement: kjr-22-1369-s007.pdf [file kjr-22-1369-s007.pdf]

**Supplementary Table 3. ICCs between the nCBV from DSC MRI and the Ktrans, Ve, and Vp from DCE MRI**

| Parameters from DSC MRI and DCE MRI | ICC* (95% CI)            | Agreement         |
|-------------------------------------|--------------------------|-------------------|
| <b>95th PV</b>                      |                          |                   |
| nCBV vs. Ktrans                     | 0.003 (-0.221 to 0.227)  | Positive but poor |
| nCBV vs. Ve                         | -0.010 (-0.234 to 0.214) | Negative          |
| nCBV vs. Vp                         | -0.093 (-0.310 to 0.134) | Negative          |
| <b>Mean value</b>                   |                          |                   |
| nCBV vs. Ktrans                     | 0.001 (-0.223 to 0.225)  | Positive but poor |
| nCBV vs. Ve                         | -0.048 (-0.269 to 0.178) | Negative          |
| nCBV vs. Vp                         | -0.078 (-0.297 to 0.149) | Negative          |
| <b>Median value</b>                 |                          |                   |
| nCBV vs. Ktrans                     | 0.001 (-0.223 to 0.225)  | Positive but poor |
| nCBV vs. Ve                         | 0.009 (-0.216 to 0.233)  | Positive but poor |
| nCBV vs. Vp                         | -0.042 (-0.264 to 0.184) | Negative          |

\* ICC values are, < 0 (negative), 0–0.20 (positive but poor), 0.21–0.40 (fair), 0.41–0.60 (moderate), 0.61–0.80 (good), or > 0.81 (excellent). CI = confidence interval, DCE = dynamic contrast-enhanced, DSC = dynamic susceptibility contrast, ICC = intraclass correlation coefficient, nCBV = normalized relative cerebral blood volume, PV = percentile value
