# Supplementary material for: Prognostic Prediction Based on Dynamic Contrast-Enhanced MRI and Dynamic Susceptibility Contrast-Enhanced MRI Parameters from Non-Enhancing, T2-High-Signal-Intensity Lesions in Patients with Glioblastoma
Source: PubMed Central journal article supplement — Korean J Radiol. 2021 May 4;22(8):1369–78. doi: 10.3348/kjr.2020.1272 (PMC8316772; doi:10.3348/kjr.2020.1272), 2021-05-04
Supplement: kjr-22-1369-s009.pdf [file kjr-22-1369-s009.pdf]

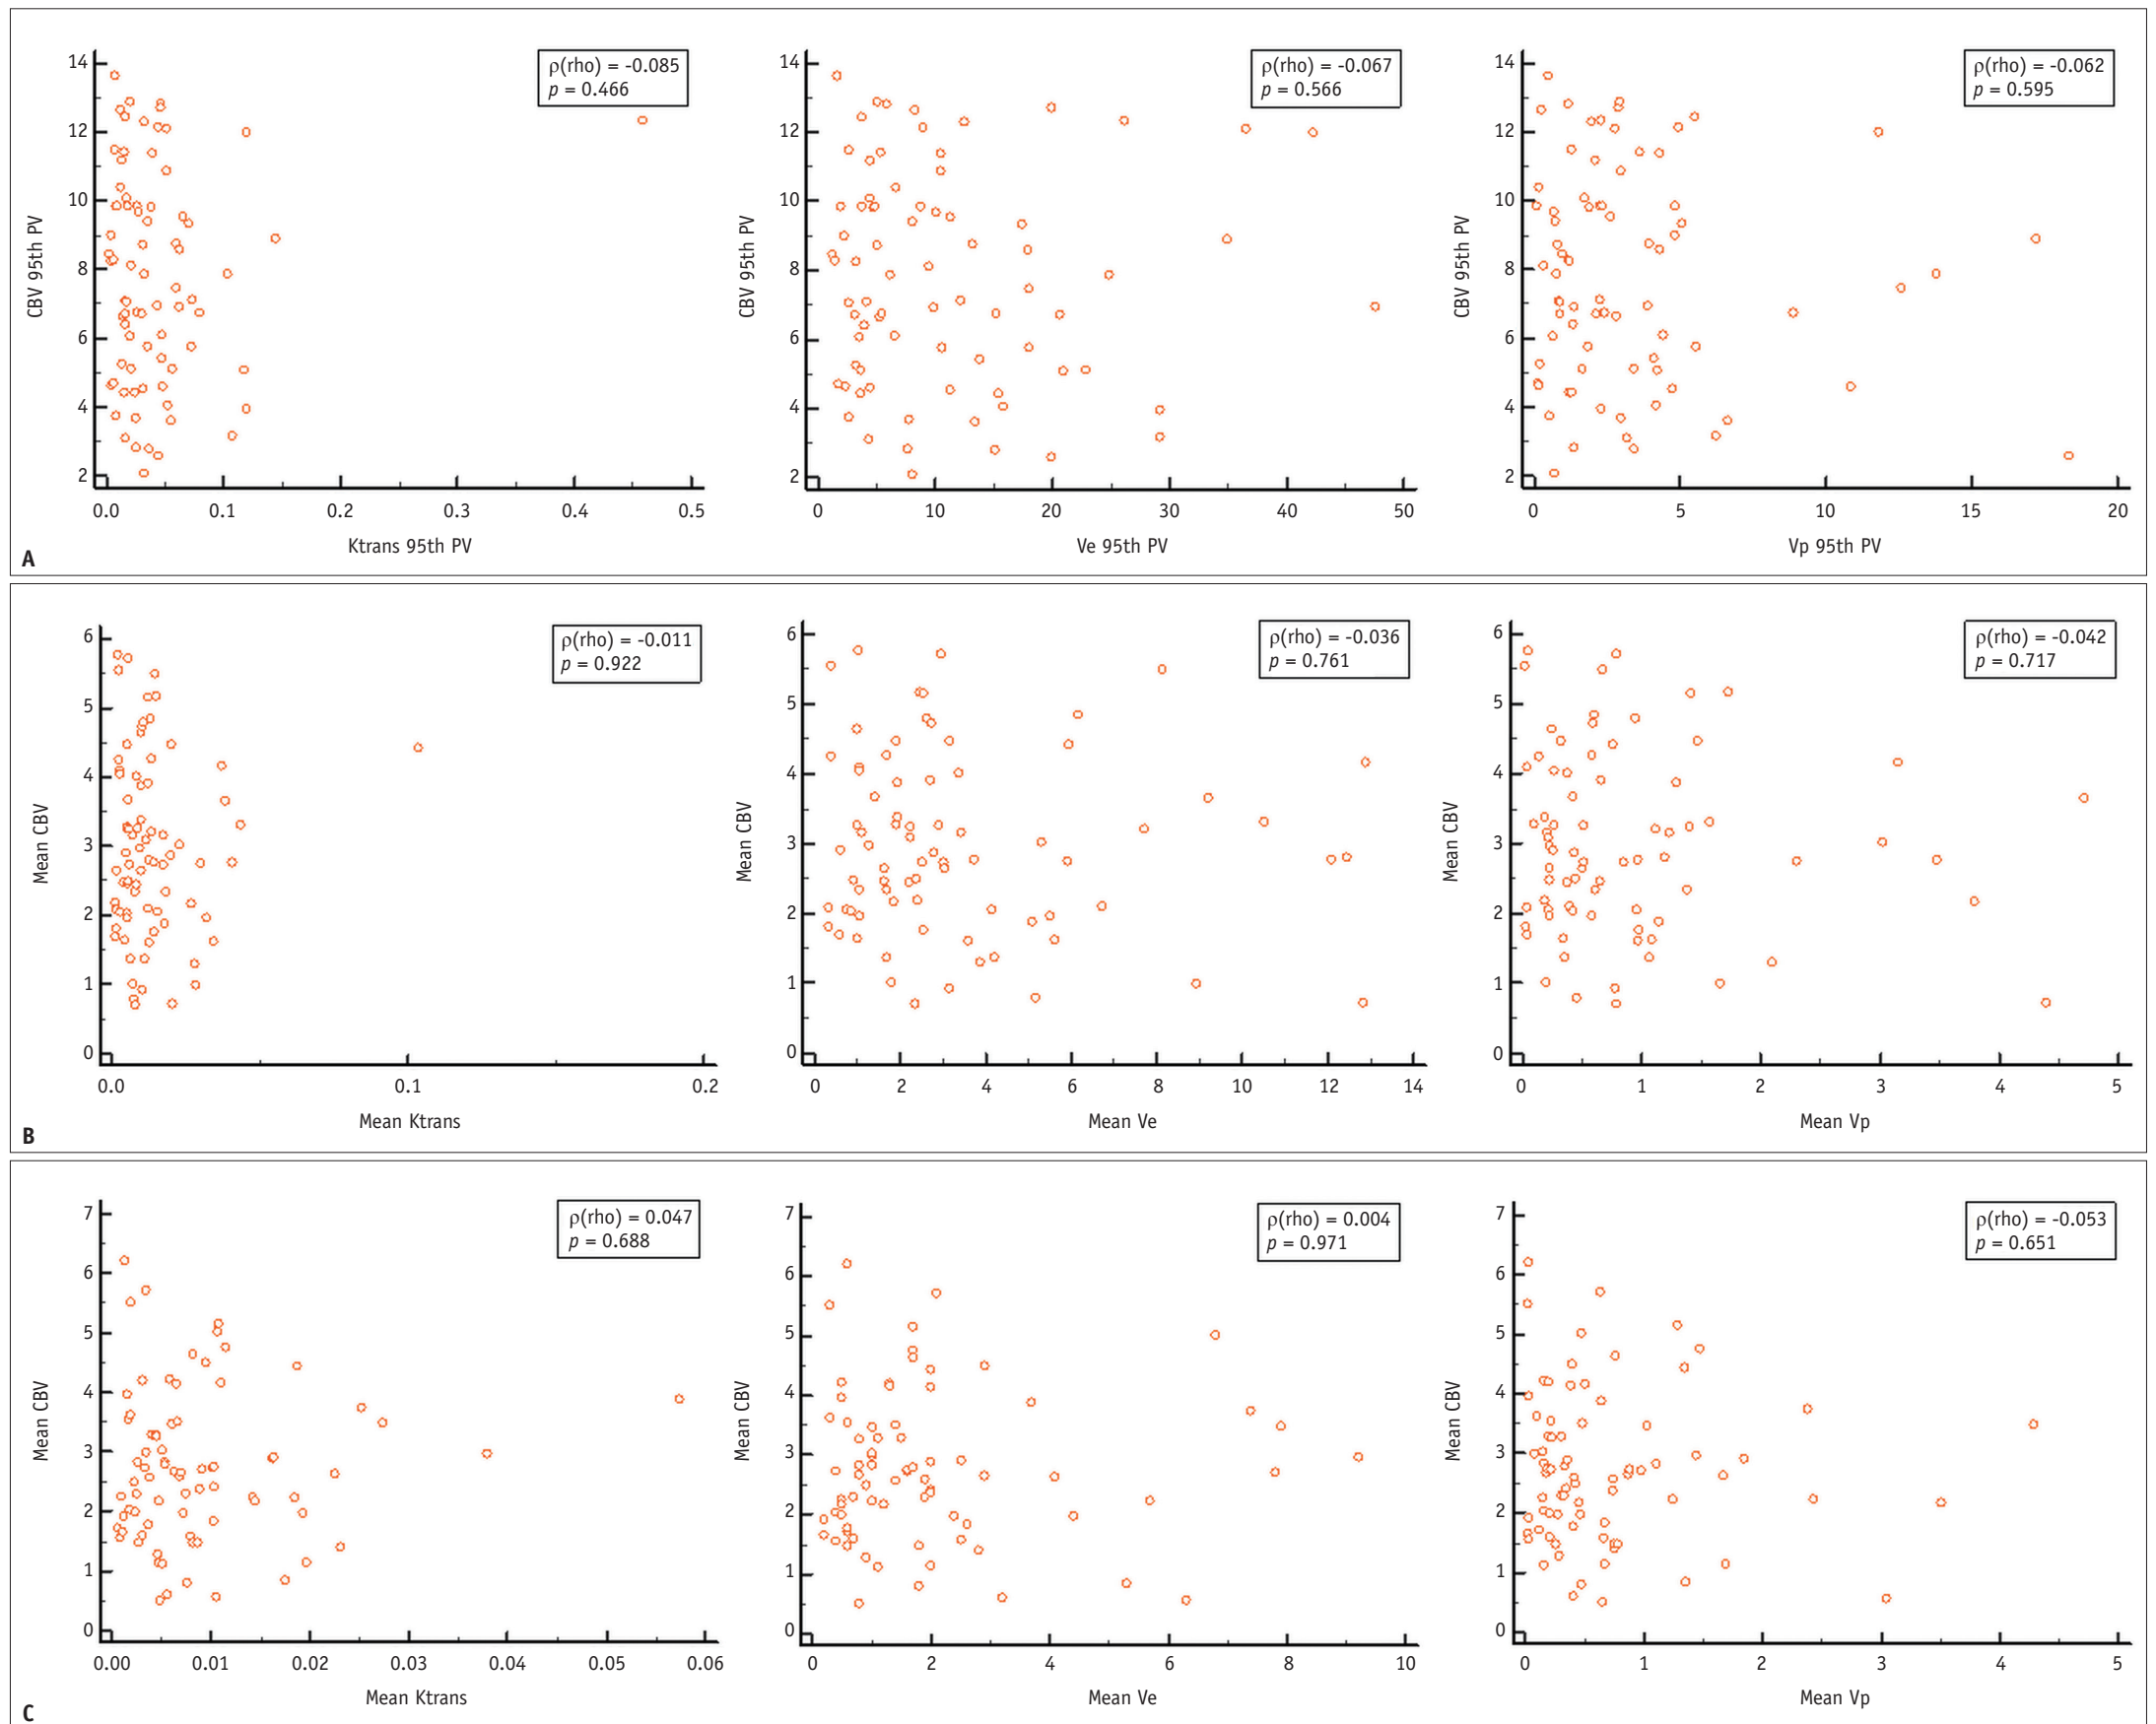

**Supplementary Fig. 2. Spearman's rank correlation analysis of the nCBV from the DSC MRI and Ktrans, Ve, and Vp from DCE MRI.**

**A-C.** Spearman's rank correlation analysis of the 95th percentile value of nCBV and Ktrans, Ve, and Vp derived from non-enhancing, T2-HSI lesions (**A**). Spearman's rank correlation analysis of the mean (**B**) or median (**C**) values of nCBV and the Ktrans, Ve, and Vp values derived from the non-enhancing, T2-HSI lesions. There were no significant correlations between the nCBV from the DSC MRI and the permeability parameters from DCE MRI. DCE = dynamic contrast-enhanced, DSC = dynamic susceptibility contrast, HSI = high-signal-intensity, nCBV = normalized relative cerebral blood volume
